# Supplementary material for: COVID-19 Vaccine Hesitancy—A Scoping Review of Literature in High-Income Countries
Source: MDPI journal article supplement (doi:10.3390/vaccines9080900), 2021-08-13
Supplement: s1 [file s1]

**Supplementary Table S1. Detailed search strategy**

| Medline                    |                  |                                                                                                                                                                                                                                                                                                                                                                                                                                                                                                                                                                                                                                                |
|----------------------------|------------------|------------------------------------------------------------------------------------------------------------------------------------------------------------------------------------------------------------------------------------------------------------------------------------------------------------------------------------------------------------------------------------------------------------------------------------------------------------------------------------------------------------------------------------------------------------------------------------------------------------------------------------------------|
| S/N                        | Key Themes       | Search details                                                                                                                                                                                                                                                                                                                                                                                                                                                                                                                                                                                                                                 |
| 1                          | COVID-19 vaccine | ((("vaccination refusal"[MeSH Terms] OR "hesitancy"[Title/Abstract] OR "confidence"[Title/Abstract] OR "accept*"[Title/Abstract] OR "doubt"[Title/Abstract] OR "uncertainty"[Title/Abstract] OR "indecision"[Title/Abstract] OR "sceptic*"[Title/Abstract] OR "reluctance"[Title/Abstract] OR "delay"[Title/Abstract] OR "reservation*"[Title/Abstract] OR "ambivalence"[Title/Abstract] OR "unwilling*"[Title/Abstract] OR "hesit*"[Title/Abstract] OR "uptake"[Title/Abstract] OR "decision"[Title/Abstract] OR "adherence"[Title/Abstract] OR "compliance"[Title/Abstract] OR "willingness"[Title/Abstract] OR "concerns"[Title/Abstract])) |
| 2                          | Hesitancy        | ("covid 19 vaccines"[MeSH Terms] OR "covid 19 vaccin*"[Title/Abstract] OR "covid vaccin*"[Title/Abstract] OR "sars cov 2 vaccin*"[Title/Abstract] OR "severe acute respiratory syndrome vaccin*"[Title/Abstract])) OR "coronavirus vaccin*"[Title/Abstract]                                                                                                                                                                                                                                                                                                                                                                                    |
| Search strategy: #1 AND #2 |                  |                                                                                                                                                                                                                                                                                                                                                                                                                                                                                                                                                                                                                                                |
| CINAHL                     |                  |                                                                                                                                                                                                                                                                                                                                                                                                                                                                                                                                                                                                                                                |
| S/N                        | Key Themes       | Search details                                                                                                                                                                                                                                                                                                                                                                                                                                                                                                                                                                                                                                 |
| 1                          | COVID-19 vaccine | MH COVID-19 vaccines OR AB covid-19 vaccin* OR AB covid vaccin* OR AB sars-cov-2 vaccin* OR AB severe acute respiratory syndrome vaccin* OR AB coronavirus vaccin*                                                                                                                                                                                                                                                                                                                                                                                                                                                                             |
| 2                          | Hesitancy        | MH vaccination refusal OR AB hesitancy OR AB confidence OR AB accept* OR AB doubt OR AB uncertainty OR AB indecision OR AB sceptic* OR AB reluctance OR AB delay OR AB reservation* OR AB ( ambivalence OR unwilling* OR hesit* OR uptake OR decision OR adherence OR compliance OR willingness OR concerns )                                                                                                                                                                                                                                                                                                                                  |
| Search strategy: #1 AND #2 |                  |                                                                                                                                                                                                                                                                                                                                                                                                                                                                                                                                                                                                                                                |
| EMBASE                     |                  |                                                                                                                                                                                                                                                                                                                                                                                                                                                                                                                                                                                                                                                |
| S/N                        | Key Themes       | Search details                                                                                                                                                                                                                                                                                                                                                                                                                                                                                                                                                                                                                                 |
| 1                          | COVID-19 vaccine | 'sars-cov-2 vaccine'/exp OR 'covid-19 vaccin*':ab,ti OR 'covid vaccin*':ab,ti OR 'sars-cov-2 vaccin*':ab,ti OR 'severe acute respiratory syndrome vaccin*':ab,ti OR 'coronavirus vaccin*':ab,ti                                                                                                                                                                                                                                                                                                                                                                                                                                                |
| 2                          | Hesitancy        | 'vaccination refusal'/exp OR hesitancy:ab,ti OR confidence:ab,ti OR accept*:ab,ti OR doubt:ab,ti OR uncertainty:ab,ti OR indecision:ab,ti OR sceptic*:ab,ti OR reluctance:ab,ti OR delay:ab,ti OR reservation*:ab,ti OR ambivalence:ab,ti OR unwilling*:ab,ti OR hesit*:ab,ti OR uptake:ab,ti OR decision:ab,ti OR adherence:ab,ti OR compliance:ab,ti OR willingness:ab,ti OR concerns:ab,ti                                                                                                                                                                                                                                                  |
| Search strategy: #1 AND #2 |                  |                                                                                                                                                                                                                                                                                                                                                                                                                                                                                                                                                                                                                                                |
| Scopus                     |                  |                                                                                                                                                                                                                                                                                                                                                                                                                                                                                                                                                                                                                                                |
| S/N                        | Key Themes       | Search details                                                                                                                                                                                                                                                                                                                                                                                                                                                                                                                                                                                                                                 |
| 1                          | COVID-19 vaccine | (( TITLE-ABS-KEY ( covid-19 AND vaccin* ) OR TITLE-ABS-KEY ( covid AND vaccin* ) OR TITLE-ABS-KEY ( sars-cov-2 AND vaccin* ) OR TITLE-ABS-KEY ( severe AND acute AND respiratory AND syndrome AND vaccin* ) OR TITLE-ABS-KEY ( coronavirus AND vaccin* ) ) )                                                                                                                                                                                                                                                                                                                                                                                   |
| 2                          | Hesitancy        | (( TITLE-ABS-KEY ( vaccination AND refusal ) OR TITLE-ABS-KEY ( hesitancy ) OR TITLE-ABS-KEY ( confidence ) OR TITLE-ABS-KEY ( accept* ) OR TITLE-ABS-KEY ( doubt ) OR TITLE-ABS-KEY ( uncertainty ) OR TITLE-ABS-KEY ( indecision ) OR TITLE-ABS-KEY ( sceptic* ) OR TITLE-ABS-KEY ( reluctance ) OR TITLE-ABS-KEY ( delay ) OR TITLE-ABS-KEY ( reservation ) OR TITLE-ABS-KEY ( ambivalence ) OR TITLE-ABS-KEY ( unwilling* ) OR TITLE-ABS-KEY (                                                                                                                                                                                             |

hesit\* ) OR TITLE-ABS-KEY ( uptake ) OR TITLE-ABS-KEY ( decision ) OR TITLE-ABS-KEY ( adherence ) OR TITLE-ABS-KEY ( compliance ) OR TITLE-ABS-KEY ( willingness ) OR TITLE-ABS-KEY ( concerns ) ) )

Search strategy: #1 AND #2

**Table S2. Characteristics of included studies.**

| Author                                     | Country      | Study design and methodology | Sample size | Age                                                                                                                         | Participants type | Gender (Male, %)               | Education                                                                                                     | Vaccine hesitancy rate (%) | Hesitancy defined as per SAGE recommendations (Y/N/NS) |
|--------------------------------------------|--------------|------------------------------|-------------|-----------------------------------------------------------------------------------------------------------------------------|-------------------|--------------------------------|---------------------------------------------------------------------------------------------------------------|----------------------------|--------------------------------------------------------|
| COCONEL GRP: Peretti-Watel et al 2020 (28) | France       | XS Online survey             | 3892        | NS                                                                                                                          | General public    | NS                             | NS                                                                                                            | 26                         | N                                                      |
| Al-Mohaithef et al 2020 (62)               | Saudi Arabia | XS Online survey             | 992         | Age 18-25: 26.6%<br>Age 26-35: 44.0%<br>Age 36-45: 24.1%<br>Above 45: 5.1%                                                  | General public    | 34.2                           | Postgraduate: 20.1%<br>Graduate: 50.1%<br>Diploma: 15.4%<br>High School: 14.4%                                | 35                         | Y                                                      |
| Alabdulla et al 2021 (20)                  | Qatar        | XS Online survey             | 7821        | Age 18 - 25: 3.3%<br>Age 26 - 35: 31.9%<br>Age 36 - 45: 34.1%<br>Age 46 - 55: 15.0%<br>Age 56 - 65: 11.6%<br>Above 65: 4.2% | General public    | 59.4                           | Graduate: 76.8%<br>Others: 12.8%<br>High school: 10.4%                                                        | 40<br>42.2^                | Y                                                      |
| AlHajri et al 2020 (19)                    | Kuwait       | XS Online survey             | 1038        | NS                                                                                                                          | General public    | NS                             | NS                                                                                                            | 55.8^                      | NS                                                     |
| Alley et al 2021 (78)                      | Australia    | MM Online survey             | 2343        | Survey 1:<br>18-34: 13.7%<br>35-44: 15.8%<br>45-54: 19.7%<br>55-64: 28.7%<br>65 and over: 22.1%<br>Survey 2:                | General public    | Survey 1: 30.4<br>Survey 2: 30 | Survey 1:<br>Year 12 or below: 11.1%<br>Technical studies, certificate, diploma: 25.4%<br>Bachelor and above: | 14                         | N                                                      |

|                             |                    |                                                                                       |      | Over 55 years old:<br>51%                                                                                           |                                           |                                                          | 63.5%<br>Survey 2:<br>Bachelor and above:<br>63% |                                                 |    |
|-----------------------------|--------------------|---------------------------------------------------------------------------------------|------|---------------------------------------------------------------------------------------------------------------------|-------------------------------------------|----------------------------------------------------------|--------------------------------------------------|-------------------------------------------------|----|
| Amin et al<br>2021 (74)     | USA                | XS Online<br>survey                                                                   | 240  | Median age: 41 - 50                                                                                                 | Healthcare<br>workers                     | 43                                                       | NS                                               | 8                                               | N  |
| Attwell et al<br>2021 (29)  | Australia          | XS Online<br>survey                                                                   | 1316 | Mean 57.95 (SD 13.2)                                                                                                | General<br>public                         | 40                                                       | Mean yrs /SD: 13.70/<br>3.43                     | 35                                              | Y  |
| Barello et al<br>2020 (101) | Italy              | XS Online<br>survey                                                                   | 934  | Mean age 23.6 (SD<br>4.9)                                                                                           | University<br>students                    | 20.4                                                     |                                                  | 13.9                                            | Y  |
| Barrière et al<br>2021 (30) | France             | XS Paper<br>survey                                                                    | 999  | Median age: 67 (IQR<br>18 -97)                                                                                      | Cancer<br>patients                        | 43.9                                                     | NS                                               | 46.3                                            | Y  |
| Beesley, et al<br>2021 (21) | Multiple countries | Longitudina<br>l<br>prospective<br>study<br>Online<br>survey                          | 1645 | Not specified                                                                                                       | Patients with<br>autoimmune<br>conditions | Not<br>specified                                         | NS                                               | 13<br>34^                                       | Y  |
| Bell, S.<br>2020 (23)       | England            | MM Online<br>survey and<br>telephone<br>interview<br>re:<br>qualitative<br>component# | 1271 | Mean 33.0 (SD 4.57)                                                                                                 | Parents                                   | 5 (97% of<br>female<br>respondents<br>have a<br>partner) | NS                                               | 9.9<br>10.9^                                    | Y  |
| Benham, J. L.<br>2021 (26)  | Canada             | Qualitative#                                                                          | 50   | Age 18–29 years: 34%<br>Age 30–39 years: 12%<br>Age 40–49 years: 8%<br>Age 50–59 years: 20%<br>Age 60 and over: 26% | General<br>public                         | 40 (n = 20)                                              | NS                                               | NS                                              | NS |
| Bogart et al<br>2021 (79)   | USA                | XS<br>Telephone<br>interview                                                          | 101  | Mean 50.3 (SD 11.5)                                                                                                 | General<br>public                         | 87                                                       | Education level less<br>than high school: 13%    | 32                                              | N  |
| Bokemper Et al<br>2020 (94) | USA                | RCT via<br>online<br>methods                                                          | 5014 | NS                                                                                                                  | General<br>public                         | NS                                                       | NS                                               | Measure<br>d<br>acceptan<br>ce as a<br>continuu | N  |

|                                |           |                                                           |      |                                                                                       |                                     |                                          |                                                                                                                  |                                                               |    |
|--------------------------------|-----------|-----------------------------------------------------------|------|---------------------------------------------------------------------------------------|-------------------------------------|------------------------------------------|------------------------------------------------------------------------------------------------------------------|---------------------------------------------------------------|----|
|                                |           |                                                           |      |                                                                                       |                                     |                                          |                                                                                                                  | m from 0-1                                                    |    |
|                                |           |                                                           |      |                                                                                       |                                     |                                          | Year 10 or below: 10.58%                                                                                         |                                                               |    |
|                                |           |                                                           |      |                                                                                       |                                     |                                          | Year 11 and 12: 15.03%                                                                                           | Discrete choice                                               |    |
|                                |           |                                                           |      |                                                                                       |                                     |                                          | Certificate I or II: 1.83%                                                                                       | experiment to                                                 |    |
|                                |           |                                                           |      |                                                                                       |                                     |                                          | Certificate III or IV: 9.04%                                                                                     | measure acceptab                                              |    |
| Borriello et al 2020 (110)     | Australia | XS Online survey                                          | 2136 | Median age: 59 (IQR: 31-76)                                                           | General public                      | 49.3                                     | Advanced Diploma or Diploma: 13.62%                                                                              | ility to 3 choices of vaccines with different characteristics | NS |
|                                |           |                                                           |      |                                                                                       |                                     |                                          | Bachelor degree and above: 42.28% (disproportionately more degree holders than in Aust representative pp of 22%) |                                                               |    |
|                                |           |                                                           |      |                                                                                       |                                     |                                          | Other: 7.63%                                                                                                     |                                                               |    |
|                                |           |                                                           |      |                                                                                       |                                     |                                          | High School/GED: 6.5%                                                                                            |                                                               |    |
| Caban-Martinez et al 2021 (63) | USA       | XS Online survey                                          | 3169 | 21 – 29: 7.2%<br>30 – 39: 31.3%<br>40 – 49: 32.9%<br>50 – 59: 24.2%<br>60 years: 4.4% | Firefighters                        | 92.5                                     | Some College: 43.0%<br>College Graduate: 50.5%                                                                   | 51.8                                                          | N  |
| Callaghan et al 2021 (31)      | USA       | XS Online survey                                          | 5009 | Weighted Mean age: 45.9                                                               | General public                      | 48.5 (weighted)                          | College degree: 34.3% (weighted)                                                                                 | 31.1                                                          | N  |
|                                |           |                                                           |      | <u>Rheumato (case)</u>                                                                |                                     |                                          |                                                                                                                  |                                                               |    |
|                                |           |                                                           |      | Age n (%)                                                                             |                                     |                                          |                                                                                                                  |                                                               |    |
|                                |           |                                                           |      | 18–24 5 (2)                                                                           |                                     |                                          |                                                                                                                  |                                                               |    |
|                                |           |                                                           |      | 25–54 83 (41)                                                                         |                                     |                                          |                                                                                                                  |                                                               |    |
|                                |           |                                                           |      | 55–64 45 (22)                                                                         |                                     |                                          |                                                                                                                  |                                                               |    |
|                                |           |                                                           |      | >65 69 (34)                                                                           |                                     |                                          |                                                                                                                  |                                                               |    |
|                                |           |                                                           |      | Age (years), n (%)                                                                    |                                     |                                          |                                                                                                                  |                                                               |    |
|                                |           |                                                           |      | <u>Onco (control)</u>                                                                 |                                     |                                          |                                                                                                                  |                                                               |    |
|                                |           |                                                           |      | Age n (%)                                                                             |                                     |                                          |                                                                                                                  |                                                               |    |
|                                |           |                                                           |      | 18–24 0 (0)                                                                           |                                     |                                          |                                                                                                                  |                                                               |    |
| Campochiaro et al 2021 (80)    | Italy     | Case control self-administered paper questionnaire survey | 472  |                                                                                       | Patients with autoimmune conditions | Rheumato 35.6 (n=96)<br>Onco 14.7 (n=38) | NS                                                                                                               | Rheumato: 17<br>Onco: 9                                       | Y  |

|                               |           |                                                 |      |                                                                                          |                               |      |                                                                               |                                                                                                                                   |   |
|-------------------------------|-----------|-------------------------------------------------|------|------------------------------------------------------------------------------------------|-------------------------------|------|-------------------------------------------------------------------------------|-----------------------------------------------------------------------------------------------------------------------------------|---|
|                               |           |                                                 |      | 25–54<br>55–64<br>>65                                                                    | 12 (18)<br>21 (31)<br>35 (51) |      |                                                                               |                                                                                                                                   |   |
| Caserotti et al<br>2021 (103) | Italy     | Longitudinal<br>prospective<br>Online<br>survey | 3691 | 38.1/14                                                                                  | General<br>public             | 30.1 | NS                                                                            | 59.9                                                                                                                              | Y |
| Chu et al<br>2021 (98)        | USA       | XS Online<br>survey                             | 934  | 46 / 16.2                                                                                | General<br>public             | 48.7 | Median: 4-year college<br>degree                                              | Measured<br>acceptance on a<br>continuum scale<br>mean of<br>responses to 4<br>qns with<br>max<br>score of<br>5: (3.98<br>/ 1.25) | N |
| Detoc et al<br>2020 (32)      | France    | XS Online<br>survey                             | 3259 | Under 30 years:<br>20.6%<br>30–49: 46.1%<br>50–64: 24.6%<br>65–80: 8.3%<br>Over 80: 0.4% | General<br>public             | 32.6 | NS                                                                            | 22.4                                                                                                                              | Y |
| Dodd et al<br>2020 (64)       | Australia | XS Online<br>survey                             | 4362 | 18-25 years: 22.1%<br>26-40 years: 27.9%<br>41-55 years: 22.0%<br>56-90 years: 28.0%     | General<br>public             | NS   | High school or less:<br>21.4%<br>Certificate I-IV: 14.1%<br>University: 64.4% | 14.3                                                                                                                              | Y |
| Dror et al<br>2020 (15)       | Israel    | XS Online<br>survey                             | 2770 | Not specified                                                                            | General<br>public             | NS   | NS                                                                            | General<br>public:<br>22<br>Nurses:<br>39<br>Drs.: 25                                                                             | N |

|                           |           |                     |      |                                                                                |                   |      |                                                                                                                                                                                                                                                                                                              |                                                                                                |   |
|---------------------------|-----------|---------------------|------|--------------------------------------------------------------------------------|-------------------|------|--------------------------------------------------------------------------------------------------------------------------------------------------------------------------------------------------------------------------------------------------------------------------------------------------------------|------------------------------------------------------------------------------------------------|---|
|                           |           |                     |      |                                                                                |                   |      |                                                                                                                                                                                                                                                                                                              | Mean:<br>28<br>On<br>vaccinat<br>ing their<br>children<br>^: 30,<br>45, 40<br>respecti<br>vely |   |
| Ehde et al<br>2021 (81)   | USA       | XS Online<br>survey | 486  | 55.7/12.6                                                                      | General<br>public | 17.3 | < 12th grade: 0.4%<br>High school graduate<br>or GED: 4.7%<br>Vocational or<br>Technical School:<br>5.8%<br>Some college: 19.5%<br>College graduate:<br>38.1%<br>Graduate or<br>professional school:<br>31.5%<br>High school<br>only(completed (Year<br>12) or not completed<br>(Year 11 or below):<br>24.6% | 15.4                                                                                           | N |
| Faasse et al<br>2020 (65) | Australia | XS Online<br>survey | 2232 | 18–29: 22.5%<br>30–49: 39.4%<br>50–59: 22.4%<br>60+: 13.9%<br>Not stated: 1.7% | General<br>public | 23.1 | Trade certificate,<br>diploma, or advance<br>diploma: 24.3%<br>Bachelor’s degree:<br>25.9%<br>Graduate diploma,<br>graduate certificate, or<br>postgraduate degree:<br>25.0%<br>Not stated: 0.3%                                                                                                             | 18.8                                                                                           | Y |

|                             |         |                                                                       |      |                                                         |                   |      |                                                                                                                                                                                                                                                                                                                                                                                                                                                                                              |      |   |
|-----------------------------|---------|-----------------------------------------------------------------------|------|---------------------------------------------------------|-------------------|------|----------------------------------------------------------------------------------------------------------------------------------------------------------------------------------------------------------------------------------------------------------------------------------------------------------------------------------------------------------------------------------------------------------------------------------------------------------------------------------------------|------|---|
| Feleszko et al<br>2021 (33) | Poland  | XS Online<br>survey                                                   | 1066 | 18–24 11.7%<br>25–34 22.8%<br>35–44 23.8<br>46–65 41.7% | General<br>public | 49.8 | NS                                                                                                                                                                                                                                                                                                                                                                                                                                                                                           | 62   | Y |
| Fisher et al<br>2020 (66)   | USA     | MM<br>telephone,<br>mail, in-<br>person face<br>to face<br>interviews | 991  | 48.0/18.1                                               | General<br>public | 48.5 | No high school<br>diploma: 9.7%<br>High school graduate<br>or equivalent: 28.2%<br>Some college: 27.6%<br>College graduate or<br>above: 34.5%<br>No qualifications:<br>4.8%<br>GCSEs grades A*–C<br>(or equivalent): 24.8%<br>AS levels (or<br>equivalent): 3.9%<br>A levels (or<br>equivalent): 24.0%<br>Certificate of higher<br>education (e.g. BA,<br>BSc, or equivalent):<br>30.5%<br>Post-graduate<br>qualifications (e.g.<br>MA, MSc, PhD,<br>DPhil): 12.1%<br>No qualification: 6.5% | 42.4 | Y |
| Freeman et al<br>2020 (105) | England | XS Online<br>survey                                                   | 2501 | 46.6 / 17.3                                             | General<br>public | 48.5 | GCSEs grades A*–C<br>(or equivalent): 26.6%<br>AS levels (or<br>equivalent): 5.0%<br>A levels (or<br>equivalent): 26.5%<br>Certificate of higher<br>education (e.g. BA, BSc,<br>or equivalent): 24.6%<br>Post-graduate<br>qualifications (e.g.                                                                                                                                                                                                                                               | 12.1 | Y |
| Freeman et al<br>2020 (34)  | U.K.    | XS Online<br>survey                                                   | 5114 | 46.9 (17.1)                                             | General<br>public | 50.3 |                                                                                                                                                                                                                                                                                                                                                                                                                                                                                              | 23.9 | N |





|                            |             |                     |      |                                                                                                                       |                       |                  |                                                                                                                                                                                                                                                                                                                              | HC<br>students<br>: 20.19<br>Non-HC<br>students<br>: 14.33                   |   |
|----------------------------|-------------|---------------------|------|-----------------------------------------------------------------------------------------------------------------------|-----------------------|------------------|------------------------------------------------------------------------------------------------------------------------------------------------------------------------------------------------------------------------------------------------------------------------------------------------------------------------------|------------------------------------------------------------------------------|---|
| Guidry et al<br>2020 (85)  | USA         | XS Online<br>survey | 788  | 45.9 / 17.15                                                                                                          | General<br>public     | 50               | NS                                                                                                                                                                                                                                                                                                                           | 40.1                                                                         | Y |
| Head et al<br>2020 (68)    | USA         | XS Online<br>survey | 3159 | 46.9/ 16.8                                                                                                            | General<br>public     | 47.2             | Less than high school<br>graduate, HS graduate,<br>GED: 23.2%<br>Some<br>college/Associate's<br>degree: 28.8%<br>Bachelor's degree:<br>29.6%<br>Graduate school:<br>18.3%<br>High school diploma<br>or equivalent: 1.7%<br>Associate's degree:<br>4.9%<br>Bachelor's degree:<br>43.1%<br>Master's degree or<br>higher: 50.3% | 33.7                                                                         | Y |
| Hoke et al<br>2021 (89)    | USA         | XS Online<br>survey | 350  | Ages not specified<br>Ages as school<br>nurse(%):<br>0–5: 24.9<br>6–15: 38.0<br>16 and more: 34.3<br>No response: 2.9 | Healthcare<br>workers | 0                |                                                                                                                                                                                                                                                                                                                              | 15.1                                                                         | N |
| Hughes et al<br>2020 (106) | U.K.        | XS Online<br>survey | 406  | 29 / 8.84                                                                                                             | General<br>public     | 28.6             | NS                                                                                                                                                                                                                                                                                                                           | Accepta<br>nce in<br>continuu<br>m scale<br>max of<br>7 5.22<br>(SD<br>1.75) | N |
| Hursh et al<br>2020 (37)   | USA         | XS Online<br>survey | 534  | 41.9 / 13.4                                                                                                           | General<br>public     | 49               | NS                                                                                                                                                                                                                                                                                                                           | NS                                                                           | N |
| Jeffs et al<br>2020 (86)   | New Zealand | XS Online<br>survey | 1191 | 39.9 ((no SD), range:<br>20-62)                                                                                       | General<br>public     | Not<br>specified | Completed high school<br>(12%), Trade<br>certificate/diploma                                                                                                                                                                                                                                                                 | 30.4^                                                                        | Y |

|                              |         |                                                                  |      |                                                                                                                                                                                                         |                    |                                                 |                                                                                                      |                                      |    |
|------------------------------|---------|------------------------------------------------------------------|------|---------------------------------------------------------------------------------------------------------------------------------------------------------------------------------------------------------|--------------------|-------------------------------------------------|------------------------------------------------------------------------------------------------------|--------------------------------------|----|
|                              |         |                                                                  |      |                                                                                                                                                                                                         |                    |                                                 | (13.3%), Bachelor's degree (31.4%) and Post-graduate degree (42.7%)                                  |                                      |    |
| Jung et al 2020 (102)        | USA     | MM: longitudinal and controlled experiments via online platforms | 560  | Median: 45                                                                                                                                                                                              | General public     | 48.5                                            | Not specified                                                                                        | N.A.                                 | NS |
| Karlsson et al 2020 (38)     | Finland | XS Online survey                                                 | 2355 | Study 1: mean 37.9 (SD: 4.75, range: 23 to 55)<br>Study 2: mean not stated, but had more respondents who were between 50 and 65 years old than Study 1<br>Study 3: mean 47.7 (SD: 13.11, range: 18-100) | General public     | Study 1: 21.2<br>Study 2: 30.7<br>Study 3: 19.1 | NS                                                                                                   | 25.2 (mean of 3 hesitations studies) | Y  |
| Khubchandani et al 2021 (39) | USA     | XS Online survey                                                 | 1878 | 18–25 years: 19%<br>26–40 years: 44%<br>41–60 years: 28%<br>≥ 61 years: 9%                                                                                                                              | General public     | 48                                              | ≤ High school: 6%<br>Some college education: 17%<br>Bachelor's degree: 48%<br>≥ Master's degree: 29% | 22                                   | N  |
| Klein et al 2021(18)         | USA     | XS Online survey                                                 | 800  | Not specified                                                                                                                                                                                           | General public     | Not specified                                   | NS                                                                                                   | NS (data not provided by author)     | NS |
| Kociolek et al 2021 (40)     | USA     | MM                                                               | 4448 | ≤40: (n=2,312)<br>≥41 (n=1,855)                                                                                                                                                                         | Healthcare workers | 17.1                                            | Job:<br>Nonclinical: 36.3%<br>Clinical: 57.7                                                         | 18.9                                 | Y  |

|                                  |           |                                                                                      |       |                                                                                                    |                       |      |                                                                                                                                                                                                                                                     |      |   |
|----------------------------------|-----------|--------------------------------------------------------------------------------------|-------|----------------------------------------------------------------------------------------------------|-----------------------|------|-----------------------------------------------------------------------------------------------------------------------------------------------------------------------------------------------------------------------------------------------------|------|---|
| Kourlaba et al<br>2021 (100)     | Greece    | MM XS<br>online<br>CATI<br>(n=502)<br>AND<br>CAWI<br>(n=502)                         | 1004  | 41.7 / 17.7                                                                                        | General<br>public     | 51   | Primary school: 6.8%<br>Middle school: 33.4%<br>College and above:<br>59.8%                                                                                                                                                                         | 42.3 | Y |
| Kreps et al<br>2020 (41)         | USA       | MM<br>embedded<br>choice<br>based<br>conjoint<br>analysis and<br>XS online<br>survey | 1971  | 18-29 : 23%<br>30-44: 29%<br>45-59: 25%<br>60 and more: 23<br><br>Median age: 43 (IQR:<br>30 - 58) | General<br>public     | 49   | Less than high school:<br>2%<br>High school/GED:<br>21%<br>Some college: 30%<br>4-y College degree:<br>24%<br>Graduate school: 24%<br>Less than Bachelor's<br>Degree: 12.6%<br>Bachelor's or Master's<br>Degree: 56.5%<br>Postgrad degree:<br>25.8% | 44   | Y |
| Kuter et al<br>2020 (42)         | USA       | XS Online<br>survey                                                                  | 12034 | Less than 40: 51%<br>40 - 64: 39.2%<br>65 and older: 3.6%<br>Unknown: 6.3%                         | Healthcare<br>workers | 21   | Unknown: 5.1%<br>Direct patient contact:<br>53.9%<br>Some patient<br>interaction: 8.9%<br>No patient interaction:<br>25.3%<br>Other/Unknown:<br>11.9%                                                                                               | 36.3 | Y |
| Kwok et al<br>2021 (92)          | Hong Kong | XS Online<br>survey                                                                  | 1205  | 40.79 / 10.47                                                                                      | Healthcare<br>workers | 10   | Degree holder: 32.7%                                                                                                                                                                                                                                | 37   | N |
| C. La Vecchia et al<br>2020 (69) | Italy     | XS Online<br>survey<br>using<br>CAWI                                                 | 1055  | 15-34: 23.8%<br>35-54: 34.1%<br>55 and more: 42.1%                                                 | General<br>public     | 48.2 | NS                                                                                                                                                                                                                                                  | 46   | N |
| E. A. Largent et al<br>2020 (75) | USA       | XS Online<br>survey                                                                  | 2730  | Not specified                                                                                      | General<br>public     | 45.9 | Less than bachelor<br>degree: 1155 (42.4%)                                                                                                                                                                                                          | 38.6 | N |

|                                  |                    |                                                     |      |                                                                                                                                                                                             |                                     |                                                              |                                                                                                                                                                                                     |                         |   |
|----------------------------------|--------------------|-----------------------------------------------------|------|---------------------------------------------------------------------------------------------------------------------------------------------------------------------------------------------|-------------------------------------|--------------------------------------------------------------|-----------------------------------------------------------------------------------------------------------------------------------------------------------------------------------------------------|-------------------------|---|
|                                  |                    |                                                     |      |                                                                                                                                                                                             |                                     |                                                              | Bachelor degree or higher: 1569 (57.6%)                                                                                                                                                             |                         |   |
| C. A. Latkin et al<br>2021 (43)  | USA                | XS<br>Combined<br>online and<br>Telephone<br>survey | 1056 | 18 to 29 years old: 71<br>(6.8%)<br>30 to 39 years old:<br>147 (14.1%)<br>40 to 59 years old:<br>373 (35.8%)<br>60 to 64 years old:<br>118 (11.3%)<br>65 years old or older:<br>334 (32.0%) | General<br>public                   | 29.9                                                         | High school and<br>below: 203 (19.5%)<br>Some college and<br>above: 840 (80.5%)                                                                                                                     | 46.4                    | Y |
| Loomba et al<br>2021 (109)       | Multiple countries | RCT via<br>online<br>platform                       | 8001 | 18-44 years:<br>45.5% (intervention),<br>63.2% (control).<br>45 and above: 54.5%<br>(intervention), 36.8%<br>(control).                                                                     | General<br>public                   | 42.3<br>(intervention<br>)<br>45.7<br>(control)              | Level 0-2: 51.9%<br>(intv), 49.6% (cntl).<br>Level 3 and 4: 41.3%<br>(intv), 43% (cntl).                                                                                                            | UK 45.9<br>U.S.<br>57.5 | Y |
| V. C. Lucia et al<br>2020 (95)   | USA                | XS Online<br>survey                                 | 168  | Not specified                                                                                                                                                                               | University<br>students              | 43                                                           | All undergraduates                                                                                                                                                                                  | 24.6                    | N |
| A. A. Malik et al<br>2020 (44)   | USA                | XS Online<br>survey                                 | 672  | 18-24 years: 73 (11%)<br>25-34 years: 107<br>(16%)<br>35-44 years: 141<br>(21%)<br>45-54 years: 95 (14%)<br>55+ years: 256 (38%)                                                            | General<br>public                   | 42                                                           | No High School: 10<br>(2%)<br>High School: 162<br>(24%)                                                                                                                                             | 33                      | Y |
| M. L. Manning et al<br>2021 (45) | USA                | XS Online<br>survey                                 | 1212 | <30 years: 710<br>(69.1%)<br>31-40 years: 220<br>(21.4%)<br>41-50 years: 68<br>(6.6%)<br>51-61 years: 22<br>(2.1%)<br>60 and greater: 2<br>(0.2%)<br>Prefer not to disclose:<br>5 (0.5%)    | University<br>staff and<br>students | Students:<br>11.3<br>FT Faculty:<br>5.1<br>Adjuncts:<br>12.4 | Students<br>Undergraduate: 486<br>(47.3%)<br>Graduate: 423 (41.2%)<br>DNP: 108 (10.5%)<br>Others: 10 (1.0%)<br><br>Faculty<br>Undergraduate: 41<br>(52.6%)<br>Graduate: 26 (33.3%)<br>DNP: 6 (7.7%) | 53.7                    | Y |

|                                     |                |                     |      |                                                                                                                                                                                                   |                   |      |                                                                                                                                                                 |                                              |    |  |
|-------------------------------------|----------------|---------------------|------|---------------------------------------------------------------------------------------------------------------------------------------------------------------------------------------------------|-------------------|------|-----------------------------------------------------------------------------------------------------------------------------------------------------------------|----------------------------------------------|----|--|
|                                     |                |                     |      | FT Faculty<br><30 years: 0 (0%)<br>31-40 years: 15<br>(20.8%)<br>41-50 years: 15 (20.8)<br>51-61 years: 25<br>(34.7%)<br>60 and greater: 11<br>(15.3%)<br>Prefer not to disclose:<br>6 (8.3%)     |                   |      | Others: 5 (6.4%)<br><br>Adjuncts<br>Undergraduate: 74<br>(70.5%)<br>Graduate: 27 (25.7%)<br>DNP: 2 (1.9%)<br>Others: 2 (1.9%)                                   |                                              |    |  |
|                                     |                |                     |      | Adjuncts<br><30 years: 4 (3.8%)<br>31-40 years: 45<br>(42.9%)<br>41-50 years: 22<br>(21.0%)<br>51-61 years: 17<br>(16.2%)<br>60 and greater: 14<br>(13.3%)<br>Prefer not to disclose:<br>3 (2.9%) |                   |      |                                                                                                                                                                 |                                              |    |  |
| McPhedran et al<br>2021 (70)        | United Kingdom | XS Online<br>survey | 1501 | 16-34 years: 466<br>(31%)<br>35-54 years: 480<br>(32%)<br>55+ years: 555 (37%)                                                                                                                    | General<br>public | 49   | NS                                                                                                                                                              | NS -<br>discrete<br>choice<br>experim<br>ent | NS |  |
| A. R. Mercadante et al<br>2021 (71) | USA            | XS Online<br>survey | 525  | 18-29 years: 110<br>(21.0%)<br>30-49 years: 172<br>(32.8%)<br>50-69 years: 168<br>(32.0%)<br>70 or older: 74<br>(14.1%)                                                                           | General<br>public | 50.1 | Some high school: 24<br>(4.6%)<br>High school diploma:<br>143 (27.2%)<br>Some college: 143<br>(27.2%)<br>Associate degree: 50<br>(9.5%)<br>Bachelor degree: 105 | 33.3                                         | N  |  |

|                                  |                    |                                                                           |      |                                                                                                                                                                                                               |                   |                           |                                                                                                                                                                                                                                                     |                                           |    |
|----------------------------------|--------------------|---------------------------------------------------------------------------|------|---------------------------------------------------------------------------------------------------------------------------------------------------------------------------------------------------------------|-------------------|---------------------------|-----------------------------------------------------------------------------------------------------------------------------------------------------------------------------------------------------------------------------------------------------|-------------------------------------------|----|
|                                  |                    |                                                                           |      | Not disclosed: 1<br>(0.2%)                                                                                                                                                                                    |                   |                           | (20.0%)<br>Master degree: 56<br>(10.7%)<br>I do not want to<br>disclose: 4 (0.8%)                                                                                                                                                                   |                                           |    |
| F. Momplaisir et al<br>2021 (27) | USA                | MM with<br>focus group<br>discussion<br>and<br>questionnaire<br>via zoom# | 24   | 46.3 (20, 63)                                                                                                                                                                                                 | General<br>public | 26.3                      | NS                                                                                                                                                                                                                                                  | NS                                        | NS |
| M. Motta et al<br>2021 (111)     | USA                | MM with<br>Online<br>survey                                               | 5940 | Not specified                                                                                                                                                                                                 | General<br>public | Not<br>specified          | NS                                                                                                                                                                                                                                                  | NS –<br>discrete<br>choice<br>experiment. | NS |
| Muqattash et al<br>2020 (87)     | UAE                | XS Online<br>survey                                                       | 1109 | [18 to 25]: 12.9%<br>[26 to 35]: 28.0%<br>[36 to 45]: 39.4%<br>[45 and over]: 19.8%                                                                                                                           | General<br>public | 27.9                      | None: 3.9%<br>High School: 10.2%<br>Diploma: 11.3%<br>Graduate: 59.1%<br>Postgraduate: 15.6%<br>Ireland<br>No qualification: 1.2%<br>Finished Mandatory<br>schooling: 6.4%<br>Finished secondary<br>school: 22.4%<br>Undergraduate degree:<br>22.5% | 52.8                                      | N  |
| J. Murphy et al<br>2021 (84)     | Multiple countries | XS Online<br>survey                                                       | 4077 | Ireland<br>18-24: 11.1%<br>25-34: 19.2%<br>35-44: 20.6%<br>45-54: 15.9%<br>55-64: 21.0%<br>65+: 12.2%<br><br>UK<br>18-24: 12.1%<br>25-34: 18.8%<br>35-44: 17.4%<br>45-54: 20.2%<br>55-64: 17.2%<br>65+: 14.2% | General<br>public | Ireland: 48.2<br>UK: 48.3 | Postgraduate degree:<br>19.8%<br>Other technical<br>qualification: 27.9%<br><br>UK<br>No qualifications:<br>2.9%<br>O-level / GCSE or<br>similar: 19.0%                                                                                             | 32.4                                      | Y  |

|                                   |                    |                     |      |                                                                                                                                                  |                   |                  |                                                                                                                                                                     |                                                                                |   |
|-----------------------------------|--------------------|---------------------|------|--------------------------------------------------------------------------------------------------------------------------------------------------|-------------------|------------------|---------------------------------------------------------------------------------------------------------------------------------------------------------------------|--------------------------------------------------------------------------------|---|
|                                   |                    |                     |      |                                                                                                                                                  |                   |                  | A level or similar:<br>18.1%<br>Diploma: 5.6%<br>Undergraduate degree:<br>28.2%<br>Postgraduate degree:<br>15.6%<br>Technical<br>qualification: 9.3%<br>Other: 1.3% |                                                                                |   |
| Neumann-Böhme et al<br>2020 (107) | Multiple countries | XS Online<br>survey | 7664 | Not specified                                                                                                                                    | General<br>public | Not<br>specified | NS                                                                                                                                                                  | 26.1                                                                           | Y |
| K. H. Nguyen et al<br>2021 (46)   | USA                | XS Online<br>survey | 3541 | 18-49 years old:<br>39.5%<br>50-64 years old:<br>42.0%<br>>=65 years old: 29.8%                                                                  | General<br>public | 33.8             | High school and<br>below: 47.0%<br>Some college or<br>college graduate:<br>35.8%<br>Above college<br>graduate: 23.8%                                                | Mean of<br>2: 35.1                                                             | N |
| Niankara et al<br>2020 (82)       | UAE                | XS Online<br>survey | 1109 | 18 to 25 years old:<br>143 (13%)<br>26 to 35 years old:<br>310 (28%)<br>36 to 45 years old:<br>437 (39%)<br>45 years old and<br>above: 219 (20%) | General<br>public | 27.86            | High school and<br>below: 156 (14%),<br>Diploma: 125 (11%),<br>Graduate: 655 (59%),<br>Postgraduate: 173<br>(16%)                                                   | 77.9                                                                           | N |
| A. A. Olagoke et al<br>2021 (76)  | USA                | XS Online<br>survey | 501  | NS                                                                                                                                               | General<br>public | 44.71            | Less than high<br>school/High school: 70<br>(14.03%)<br>Some college: 161<br>(32.26%)<br>College or more: 268<br>(53.71%)                                           | Accepta<br>nce<br>continuu<br>m scale<br>maxx<br>score of<br>5: 4.24<br>(1.04) | N |
| L. Palamenghi et al<br>2020 (99)  | Italy              | XS Online<br>survey | 1972 | NS                                                                                                                                               | General<br>public | NS               | NS                                                                                                                                                                  | 41                                                                             | Y |
| K. Pogue et al<br>2020 (22)       | USA                | XS Online<br>survey | 316  | Less than 18: 7<br>(2.16%)                                                                                                                       | General<br>public | 49.07            | NS                                                                                                                                                                  | 31.5                                                                           | Y |

|                                 |         |                                                              |      |                                                                                                                                     |                                           |                                    |                                                                                                                                                                                                                                                                          |                                                        |   |
|---------------------------------|---------|--------------------------------------------------------------|------|-------------------------------------------------------------------------------------------------------------------------------------|-------------------------------------------|------------------------------------|--------------------------------------------------------------------------------------------------------------------------------------------------------------------------------------------------------------------------------------------------------------------------|--------------------------------------------------------|---|
|                                 |         |                                                              |      | 18-25: 40 (12.4%)<br>26-35: 59 (18.2%)<br>36-45: 102 (31.5%)<br>46-55: 11 (3.4%)<br>>55: 105 (32.4%)                                |                                           |                                    |                                                                                                                                                                                                                                                                          | Mean<br>21.5^                                          |   |
| G. Prati et al<br>2020 (96)     | Italy   | XS Online<br>survey                                          | 624  | Not specified                                                                                                                       | General<br>public                         | NS                                 | NS                                                                                                                                                                                                                                                                       | 15.2                                                   | Y |
| R. Priori et al<br>2021 (47)    | Italy   | Case<br>control<br>online<br>survey                          | 1175 | Not specified                                                                                                                       | Patients with<br>autoimmune<br>conditions | NS                                 | NS                                                                                                                                                                                                                                                                       | Rheuma<br>to:<br>45.1%<br>Healthy<br>controls:<br>17.7 | Y |
| P. L. Reiter et al<br>2020 (48) | USA     | XS Online<br>survey                                          | 2006 | 18-29 years old: 313<br>(16%)<br>30-49 years old: 657<br>(33%)<br>50-64 years old: 532<br>(27%)<br>65 years and older:<br>504 (25%) | General<br>public                         | 43                                 | Less than high school<br>degree: 105 (5%)<br>High school degree:<br>589 (29%)<br>Some college: 629<br>(31%)<br>College degree or<br>more: 683 (34%)                                                                                                                      | 31                                                     | Y |
| Romer et al<br>2020 (72)        | USA     | Longitudina<br>l<br>prospective<br>study<br>Online<br>survey | 1890 | (18-29): (20.5 -<br>20.7)%<br>(30-44): (23.9 -<br>24.1)%<br>(45-59): (24.9 -<br>25.2)%<br>60+: (30.0 - 30.7)%                       | General<br>public                         | Wave 1:<br>45.6<br>Wave 2:<br>44.3 | High school: (32.6 -<br>32.6)%<br>Some College: (47.8 -<br>48.3)%<br>Post-Grad: (19.6 -<br>30.1)%<br>HS or less: 160<br>(19.9%)<br>Some college /<br>associates degree: 221<br>(27.5%)<br>4 years college degree:<br>236 (29.4%)<br>Post-graduate degree:<br>187 (23.3%) | Mean of<br>2: 20.2                                     | N |
| J. B. Ruiz et al<br>2021 (49)   | USA     | XS Online<br>survey                                          | 804  | 18-24: 118 (14.7)<br>25-34: 146 (18.2)<br>35-44: 150 (18.7)<br>45-54: 135 (16.8)<br>55-64: 114 (14.2)<br>>=65: 141 (17.5)           | General<br>public                         | 46.4                               |                                                                                                                                                                                                                                                                          | 37.8                                                   | Y |
| Schmelz et al<br>2020 (50)      | Germany | XS Online<br>survey                                          | 4799 | 48 / 16                                                                                                                             | General<br>public                         | 49                                 | NS                                                                                                                                                                                                                                                                       | 22                                                     | Y |



|                                 |           |                                                                          |      |                                                                                                                                                                                                    |                       |      |                                                                                                                                                                                                                                                                                             |      |   |
|---------------------------------|-----------|--------------------------------------------------------------------------|------|----------------------------------------------------------------------------------------------------------------------------------------------------------------------------------------------------|-----------------------|------|---------------------------------------------------------------------------------------------------------------------------------------------------------------------------------------------------------------------------------------------------------------------------------------------|------|---|
| Schwarzinger et al<br>2021 (51) | France    | MM Online<br>survey with<br>embedded<br>discrete<br>choice<br>experiment | 1942 | 18-24: 257 (13.2%)<br>25-34: 391 (20.1%)<br>35-44: 427 (22%)<br>45-54: 448 (23.1%)<br>55-64: 419 (21.6%)                                                                                           | General<br>public     | 48.9 | Some high school: 854<br>(44%) High<br>school graduate: 420<br>(21.6%) University<br>graduate: 668 (34.4%)                                                                                                                                                                                  | 28.8 | N |
| H. Seale et al<br>2021 (73)     | Australia | XS Online<br>survey                                                      | 1143 | 18-29 years old: 295<br>(20.8%)<br>30-49 years old: 508<br>(35.8%)<br>50-69 years old: 419<br>(29.5%)<br>70+ years old: 198<br>(13.9%)                                                             | General<br>public     | 47.7 | Year 10 or below: 161<br>(11.3%)<br>High school: 235<br>(16.5%)<br>Trade/apprenticeship/c<br>ert: 483 (34%)<br>University: 541<br>(38.1%)                                                                                                                                                   | 20   | Y |
| Shaw et al<br>2021 (52)         | USA       | MM Online<br>survey and<br>2 opened<br>questions                         | 5308 | 42.5                                                                                                                                                                                               | Healthcare<br>workers | 26   | 58.5% provide direct<br>patient care; among<br>these 32.2% provided<br>care for patients with<br>COVID-19<br>No formal education: 1<br>(<0.1%)<br>High school graduate,<br>diploma or the<br>equivalent (for<br>example GED): 46<br>(1.3%)<br>Some college credit,<br>no degree: 169 (4.9%) | 42.3 | Y |
| R. Shekhar et al 2021 (53)      | USA       | XS Online<br>survey                                                      | 3479 | 18-30 years old: 816<br>(23%)<br>31-40 years old: 1061<br>(30%)<br>41-50 years old: 686<br>(20%)<br>51-60 years old: 571<br>(16%)<br>61-70 years old: 326<br>(9.4%)<br>>70 years old: 19<br>(0.5%) | Healthcare<br>workers | 25   | Trade / technical /<br>vocational training:<br>111 (3.2%)<br>Associate degree: 364<br>(10%)<br>Bachelor degree: 1046<br>(30%)<br>Master degree: 606<br>(17%)<br>Professional degree:<br>297 (8.5%)                                                                                          | 64   | Y |

|                                  |                    |                     |      |                                                                                                      |                        |                                                                                               |                                                                                                                                                                |                                                                                          |   |
|----------------------------------|--------------------|---------------------|------|------------------------------------------------------------------------------------------------------|------------------------|-----------------------------------------------------------------------------------------------|----------------------------------------------------------------------------------------------------------------------------------------------------------------|------------------------------------------------------------------------------------------|---|
| S. M. Sherman et al<br>2020 (54) | United Kingdom     | XS Online<br>survey | 1500 | Not specified                                                                                        | General<br>public      | 48.6                                                                                          | Doctorate degree: 839<br>(24%)<br>Degree equivalent or<br>higher: 789 (52.6%)<br>Degree equivalent or<br>higher: 604 (46.9%)<br>Prefer not to say: 7<br>(0.5%) | 36                                                                                       | N |
| P. Sprengholz et al<br>2021 (93) | Italy              | XS Online<br>survey | 1349 | 47.31 years old (SD:<br>14.02)                                                                       | General<br>public      | 49.4                                                                                          | NS                                                                                                                                                             | Accepta<br>mce<br>Continu<br>um<br>scale<br>max<br>score of<br>7: 4.43<br>(SD=2.3<br>3). | N |
| Szilagyi et al<br>2021 (55)      | USA                | XS Online<br>survey | 8167 | address-based<br>sampling to allow<br>statistical inferences                                         | General<br>public      | NS but<br>mentioned<br>address-<br>based<br>sampling to<br>allow<br>statistical<br>inferences | NS but mentioned<br>address-based<br>sampling to allow<br>statistical inferences                                                                               | Mean of<br>2: 34.9                                                                       | Y |
| B. Szmyd et al<br>2021 (108)     | Poland             | XS Online<br>survey | 1971 | Median age (Medical<br>students): 21 (20-24)<br>Median age (non-<br>medical students): 20<br>(19-22) | University<br>students | Medical<br>students:<br>35.23<br>Non-medical<br>students:<br>56.70                            | Undergraduates: 100%                                                                                                                                           | MS:<br>8.01<br>Non-<br>MS:<br>40.58                                                      | N |
| Taylor et al<br>2020 (90)        | Multiple countries | XS Online<br>survey | 3674 | mean age was 53<br>years (SD = 15 years)                                                             | General<br>public      | 57                                                                                            | Completed full or<br>partial college: 82%                                                                                                                      | America<br>ns:25<br>Canadia<br>ns: 20                                                    | N |
| Underschultz et al<br>2021 (88)  | Canada             | XS Online<br>survey | 1593 | 16 - 29: 52%<br>30 - 49: 27%<br>50+: 21%                                                             | General<br>public      | 29                                                                                            | High School and<br>below: 13%<br>Bachelor's degree (in                                                                                                         | 7                                                                                        | N |

|                                |                    |                                 |      |                                                                                                                                                                           |                       |       |                                                                                                                                      |                    |   |
|--------------------------------|--------------------|---------------------------------|------|---------------------------------------------------------------------------------------------------------------------------------------------------------------------------|-----------------------|-------|--------------------------------------------------------------------------------------------------------------------------------------|--------------------|---|
|                                |                    |                                 |      |                                                                                                                                                                           |                       |       | process of or<br>completed): 56%<br>Post-graduate degree<br>(in process of or<br>completed): 31%                                     |                    |   |
| K. T. Unroe et al<br>2021 (56) | USA                | XS Phone<br>and email<br>survey | 8243 | 16-24 years old: 1044<br>(12.7%)<br>25-40 years old: 3053<br>(37.0%)<br>41-60 years old: 3204<br>(38.9%)<br>>60 years old: 938<br>(11.4%)                                 | Healthcare<br>workers | 12.6  | NS                                                                                                                                   | 55.1               | Y |
| P. Verger et al<br>2021 (57)   | Multiple countries | XS Online<br>survey             | 2678 | 18-39: 920 (34.4%)<br>40-59: 1250 (46.7%)<br>≥60: 508 (19.0%)                                                                                                             | Healthcare<br>workers | 30.75 | NS                                                                                                                                   | 28.4               | Y |
| K. Wang et al<br>2020 (58)     | Hong Kong          | XS Online<br>survey             | 806  | 18-29 years old: 174<br>(21.6%)<br>30-39 years old: 251<br>(31.1%)<br>40-49 years old: 218<br>(27.1%)<br>50+ years old: 163<br>(20.2%)                                    | Healthcare<br>workers | 12.50 | NS                                                                                                                                   | 60                 | Y |
| K. Wang et al<br>2021 (59)     | Hong Kong          | XS Online<br>survey             | 1196 | 18-29 years old: 161<br>(16.1%)<br>30-39 years old: 225<br>(22.5%)<br>40-49 years old: 247<br>(24.7%)<br>50-59 years old: 243<br>(24.3%)<br>60+ years old: 124<br>(12.4%) | General<br>public     | 53.90 | Below high school: 45<br>(4.5%)<br>High School: 255<br>(25.5%)<br>Preparatory: 246<br>(24.6%)<br>University or above:<br>454 (45.4%) | Mean of<br>2: 41.2 | N |
| J. K. Ward et al<br>2020 (60)  | France             | XS Online<br>survey             | 5018 | <35 years old: 33.1%<br>35-64 years old: 25.8%<br>>64 years old: 10.7%                                                                                                    | General<br>public     | 20.60 | Lower than high<br>school degree: 23.6%<br>High school degree:<br>27.5%<br>Two or three year                                         | 24                 | N |

|                             |           |                                                                     |      |                                                                                                                                                                   |                   |                              |                                                                                                                                                                                                                                                                                                                                                                         |                                                                         |   |  |
|-----------------------------|-----------|---------------------------------------------------------------------|------|-------------------------------------------------------------------------------------------------------------------------------------------------------------------|-------------------|------------------------------|-------------------------------------------------------------------------------------------------------------------------------------------------------------------------------------------------------------------------------------------------------------------------------------------------------------------------------------------------------------------------|-------------------------------------------------------------------------|---|--|
|                             |           |                                                                     |      |                                                                                                                                                                   |                   |                              |                                                                                                                                                                                                                                                                                                                                                                         | undergraduate degree:<br>23.8%<br>Higher than Bachelor<br>degree: 21.4% |   |  |
| W. Wardha et al<br>2021*    | USA       | XS On site<br>face to face<br>administere<br>d<br>questionnair<br>e | 220  | Not specified                                                                                                                                                     | General<br>public | NS                           | NS                                                                                                                                                                                                                                                                                                                                                                      | 35                                                                      | Y |  |
| Williams et al<br>2020 (97) | U.K.      | MM with<br>XS Online<br>survey and<br>opened<br>ended<br>questions  | 527  | 59.5 / 16                                                                                                                                                         | General<br>public | 43                           | High School: 17.3%<br>College: 31.2%<br>University: 29.1%<br>Postgraduate: 22.3%                                                                                                                                                                                                                                                                                        | 14.4                                                                    | Y |  |
| Williams et al<br>2021 (83) | Scotland  | XS Online<br>survey                                                 | 3436 | Time 1:<br>18-49 years old: 1847<br>(53.8%)<br>50+ years old: 1578<br>(45.9%)<br><br>Time 2:<br>18-49 years old: 974<br>(48.3%)<br>50+ years old: 1034<br>(51.5%) | General<br>public | Time 1: 19.4<br>Time 2: 17.9 | Time 1<br>No quals / left school<br>16:<br>168 (4.9%)<br>High school / college:<br>780 (22.7%)<br>University:<br>2435 (70.9%)<br><br>Time 2<br>No quals / left school<br>16:<br>77 (3.8%)<br>High school / college:<br>439 (21.8%)<br>University:<br>1467 (72.8%)<br>Primary or below: 442<br>(36.8%)<br>Secondary: 474<br>(39.5%)<br>Tertiary or above: 275<br>(22.9%) | 24                                                                      | Y |  |
| Wong et al<br>2021 (91)     | Hong Kong | XS<br>Telephone<br>interview                                        | 1200 | 18-24 years old: 71<br>(5.9%)<br>25-34 years old: 68<br>(5.7%)<br>35-44 years old: 112<br>(9.3%)                                                                  | General<br>public | 28.7                         |                                                                                                                                                                                                                                                                                                                                                                         | 57.8                                                                    | Y |  |

|                                    |                    |                                                                                                                                         |      |                                                                                                                                        |                       |      |                                |      |    |
|------------------------------------|--------------------|-----------------------------------------------------------------------------------------------------------------------------------------|------|----------------------------------------------------------------------------------------------------------------------------------------|-----------------------|------|--------------------------------|------|----|
|                                    |                    |                                                                                                                                         |      | 45-54 years old: 124<br>(10.3%)<br>55-64 years old: 261<br>(21.8%)<br>>=65 years old: 562<br>(46.8%)<br>Refused to answer: 2<br>(0.2%) |                       |      | Refused to answer: 9<br>(0.8%) |      |    |
| T. Yoda et al<br>2021 (61)         | Japan              | XS Online<br>survey<br>MM:<br>Combined<br>stratified,<br>dual-frame<br>(landline<br>and cell<br>phone)<br>random<br>digit dial<br>(RDD) | 1100 | 44.8                                                                                                                                   | General<br>public     | 53.1 | NS                             | 34.3 | Y  |
| Hamel et al<br>2020 (77)           | USA                | telephone<br>sample.<br>Computer-<br>assisted<br>telephone<br>interviews<br>were<br>conducted<br>with the<br>RDD<br>sample.             | 1769 | Not specified                                                                                                                          | General<br>public     | 49   | NS                             | 34   | N  |
| Survey Healthcare Globus<br>2020** | Multiple countries | XS Online<br>survey                                                                                                                     | 484  | Not specified                                                                                                                          | Healthcare<br>workers | NS   | NS                             | NS   | NS |

Abbreviations: NS – not specified; XS – cross sectional; MM – mixed methods; CAWI – Computer Assisted Web Interview; CATI – Computer Assisted Telephone Interview; SD – standard deviation; IQR: Interquartile range

# – Qualitative studies with well described methodologies

\* – not full text

\*\* – explored healthcare workers on their opinions of what could be the reasons of vaccine hesitancy in their patients

^ – refers to guardians' hesitancy towards their wards
